# Supplementary material
Source: PubMed Central journal article supplement (PMC6752019)
Supplement: AEM.00717-19-s0001.pdf [file AEM.00717-19-s0001.pdf]

**Table S1. PHB content of NGR234 and test mutants.**

| Stationary phase         |                                            |           | Bacteroids               |                                   |         |
|--------------------------|--------------------------------------------|-----------|--------------------------|-----------------------------------|---------|
| Treatment                | (µg ml <sup>-1</sup> OD600 <sup>-1</sup> ) |           | Treatment                | (µg g <sup>-1</sup> fresh weight) |         |
| <i>phaZ</i> (NGR_b03370) | 0.773 ± 0.020                              | a         | WT                       | 47.6 ± 4.4                        | a       |
| Δ <i>phbC1</i>           | 0.762 ± 0.011                              | a b       | Δ <i>phaP1</i>           | 47.3 ± 4.5                        | a       |
| WT                       | 0.758 ± 0.020                              | a b       | <i>phaZ</i> (NGR_b03370) | 47.0 ± 6.7                        | a       |
| Δ <i>phaP3</i>           | 0.746 ± 0.063                              | a b       | Δ <i>phbC1</i>           | 47.4 ± 10.9                       | a b     |
| Δ <i>phbC1C2+C2</i>      | 0.721 ± 0.050                              | a b c     | Δ <i>phbC1C2+C2</i>      | 45.0 ± 7.5                        | a b     |
| Δ <i>phaP4</i>           | 0.709 ± 0.060                              | a b c     | Δ <i>phaP2</i>           | 43.4 ± 9.5                        | a b c   |
| Δ <i>phaP3P4</i>         | 0.695 ± 0.063                              | a b c d   | Δ <i>phaP2P3+P3</i>      | 39.9 ± 2.0                        | a b c d |
| Δ <i>phaP1</i>           | 0.615 ± 0.094                              | b c d e   | Δ <i>phaP1P4</i>         | 33.1 ± 5.9                        | b c d e |
| Δ <i>phaP1P4</i>         | 0.538 ± 0.034                              | c d e f   | Δ <i>phaP4</i>           | 31.3 ± 5.0                        | c d e f |
| Δ <i>phaP1P3</i>         | 0.529 ± 0.022                              | c d e f   | Δ <i>phaP1P2</i>         | 30.0 ± 2.4                        | c d e f |
| Δ <i>phaP2</i>           | 0.516 ± 0.093                              | d e f g   | Δ <i>phaP1P3</i>         | 27.6 ± 5.0                        | d e f   |
| Δ <i>phaP2P3</i>         | 0.464 ± 0.036                              | e f g h   | Δ <i>phaP3</i>           | 23.8 ± 5.3                        | e f g   |
| Δ <i>phaP2P3+P3</i>      | 0.375 ± 0.030                              | e f g h i | Δ <i>phaP2P4</i>         | 22.1 ± 3.8                        | e f g   |
| Δ <i>phaP2P4</i>         | 0.310 ± 0.024                              | f g h i j | Δ <i>phaP3P4</i>         | 14.1 ± 1.1                        | f g h   |
| Δ <i>phaP1P2</i>         | 0.060 ± 0.004                              | g h i j   | Δ <i>phaP2P3</i>         | 9.8 ± 1.3                         | g h     |
| Δ <i>phaP1P2P3P4</i>     | 0.056 ± 0.002                              | h i j     | Δ <i>phaP1P2P3</i>       | 9.4 ± 1.0                         | g h     |
| Δ <i>phaP1P2P3</i>       | 0.045 ± 0.006                              | i j       | Δ <i>phbC1C2</i>         | 8.0 ± 0.3                         | h       |
| Δ <i>phbC1C2</i>         | 0.028 ± 0.002                              | j         | Δ <i>phaP1P2P3P4</i>     | 7.5 ± 1.4                         | h       |
| Δ <i>phbC2</i>           | 0.026 ± 0.002                              | j         | Δ <i>phbC2</i>           | 7.5 ± 0.5                         | h       |

Brown-Forsythe Test (P value < 0.05) rejects the assumption of equal variances. Different letters indicate significant difference between means (average ± SD is shown; n=9 from three independent experiments) based on multiple comparisons (q value < 0.05, Two-stage linear step-up procedure of Benjamini, Krieger and Yekutieli) after Kruskal-Wallis test.

**Table S2. Symbiotic phenotypes of NGR234 and test mutants on *Vigna unguiculata*.**

| Treatment                | Chlorophyll content<br>(SPAD value) |      | Shoot dry weight<br>(g/plant) |      | Number<br>of plants | Number of<br>independent<br>experiments |
|--------------------------|-------------------------------------|------|-------------------------------|------|---------------------|-----------------------------------------|
| Control                  | 22.2 ± 1.2                          | (*)  | 0.21 ± 0.01                   | (*)  | 45                  | 5                                       |
| WT                       | 43.3 ± 1.0                          |      | 0.34 ± 0.01                   |      | 47                  | 5                                       |
| $\Delta phaP1$           | 39.7 ± 0.9                          | (ns) | 0.32 ± 0.02                   | (ns) | 19                  | 2                                       |
| $\Delta phaP2$           | 43.1 ± 1.6                          | (ns) | 0.33 ± 0.03                   | (ns) | 19                  | 2                                       |
| $\Delta phaP3$           | 40.3 ± 0.9                          | (ns) | 0.30 ± 0.02                   | (ns) | 20                  | 2                                       |
| $\Delta phaP4$           | 39.7 ± 1.6                          | (ns) | 0.38 ± 0.02                   | (ns) | 20                  | 2                                       |
| $\Delta phaP1P2$         | 40.5 ± 1.4                          | (ns) | 0.26 ± 0.02                   | (ns) | 20                  | 2                                       |
| $\Delta phaP1P3$         | 44.7 ± 1.7                          | (ns) | 0.31 ± 0.02                   | (ns) | 20                  | 2                                       |
| $\Delta phaP2P3$         | 42.9 ± 1.6                          | (ns) | 0.26 ± 0.02                   | (ns) | 20                  | 2                                       |
| $\Delta phaP2P3+P3$      | 41.3 ± 1.2                          | (ns) | 0.28 ± 0.02                   | (ns) | 30                  | 3                                       |
| $\Delta phaP1P2P3$       | 40.0 ± 1.6                          | (ns) | 0.30 ± 0.02                   | (ns) | 20                  | 2                                       |
| $\Delta phaP1P2P3P4$     | 44.8 ± 1.4                          | (ns) | 0.33 ± 0.01                   | (ns) | 29                  | 3                                       |
| $\Delta phbC1$           | 40.7 ± 1.1                          | (ns) | 0.37 ± 0.03                   | (ns) | 19                  | 2                                       |
| $\Delta phbC2$           | 40.0 ± 1.0                          | (ns) | 0.36 ± 0.02                   | (ns) | 28                  | 3                                       |
| $\Delta phbC1C2$         | 40.7 ± 1.1                          | (ns) | 0.24 ± 0.01                   | (*)  | 29                  | 3                                       |
| $\Delta phbC1C2+C2$      | 40.6 ± 1.4                          | (ns) | 0.29 ± 0.005                  | (ns) | 30                  | 3                                       |
| <i>phaZ</i> (NGR_b03370) | 41.3 ± 1.0                          | (ns) | 0.32 ± 0.01                   | (ns) | 20                  | 2                                       |

\* and ns, significant and non-significant difference between means of each treatment and wild-type strain (average ± SEM). Duncan's test for chlorophyll content and Kruskal-Wallis test followed by Mann-Whitney test (Bonferroni correction) for shoot dry weight.

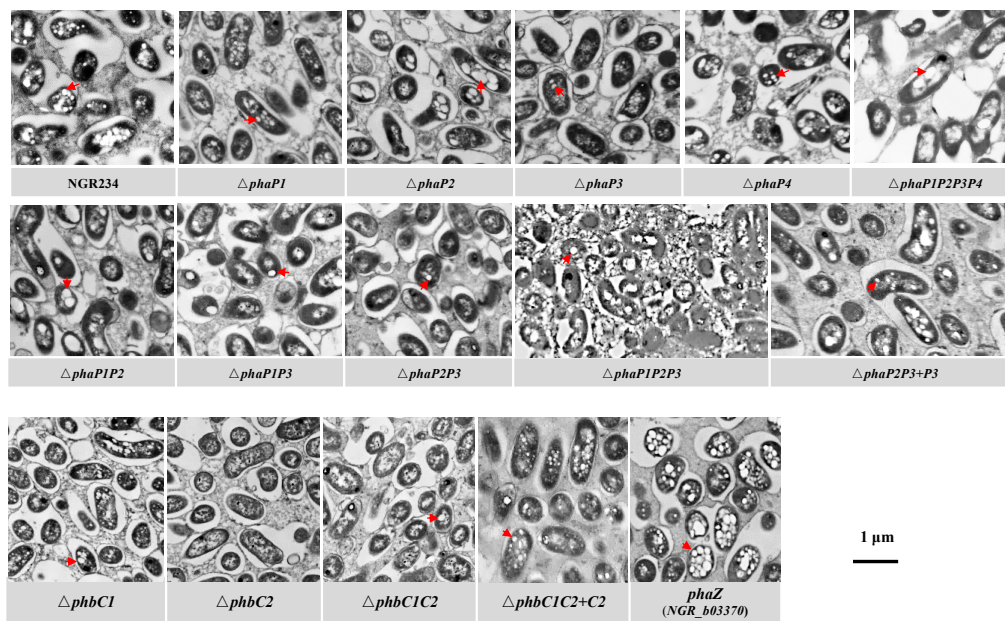

**Figure S1 Pictures of ultrathin sections of nodules obtained under transmission electronic microscopy. Red arrows indicate PHB granules.**

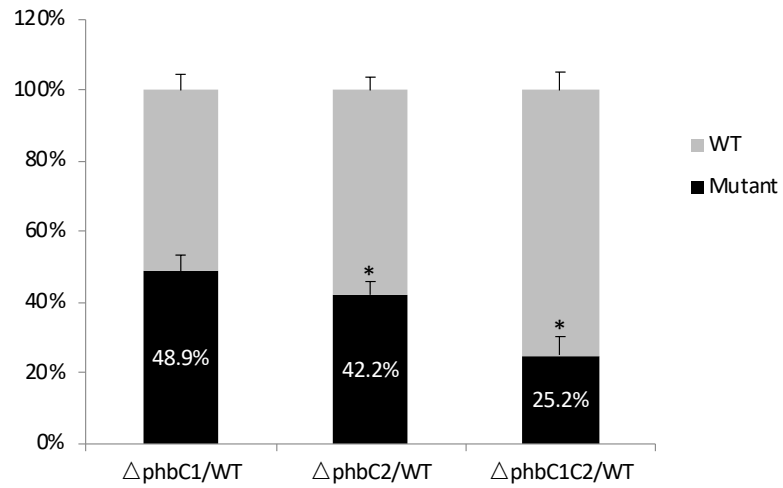

**Figure S2 Nodule occupancy by NGR234 and mutants on *Vigna unguiculata*.** Values represent means  $\pm$  standard error of the mean based on 286~367 nodules per treatment from three independent experiments. \*, significant difference between means of wild-type (WT) and indicated mutant (t-test,  $P < 0.05$ ).

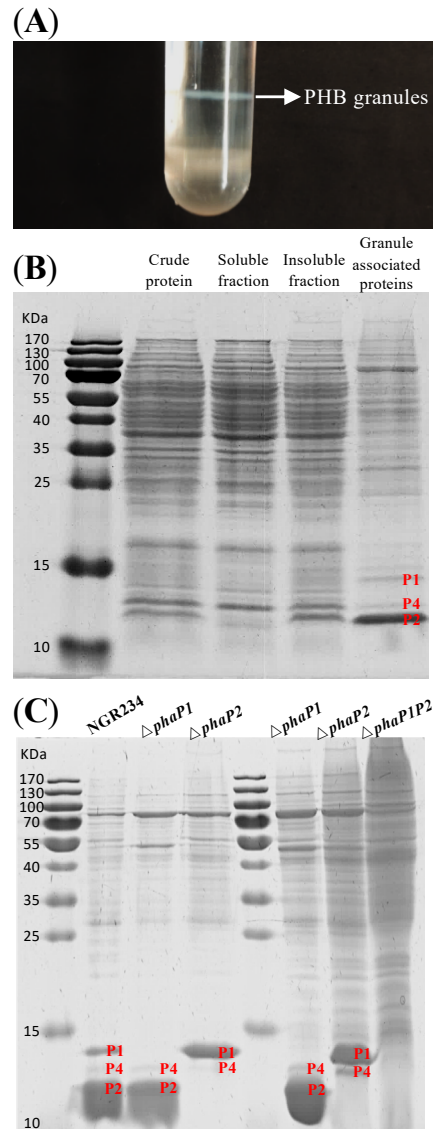

**Figure S3. Isolation of PHB associated proteins from NGR234 and strains lacking *phaP1* and/or *phaP2*.** (A) The PHB granule layer (located between 1.66 M and 1.33 M sucrose solution). (B) SDS-PAGE of proteins from soluble and insoluble fractions, and those associated with PHB granules from wild-type NGR234. (C) SDS-PAGE of PHB associated proteins from NGR234,  $\Delta phaP1$ ,  $\Delta phaP2$  and  $\Delta phaP1P2$ . Granule-associated protein samples from these strains were used in subsequent nanospray ESI-MS analysis. Three identified phasins are indicated in red.
